# Supplementary material for: Support for Sustainable Use of Personal Health Records: Understanding the Needs of Users as a First Step Towards Patient-Driven Mobile Health
Source: PubMed Central journal article supplement (PMC5344982; doi:10.2196/mhealth.6021), 2017-02-23
Supplement: mhealth_v5i2e19_app1.pdf [file mhealth_v5i2e19_app1.pdf]

|                 |     |      |      |        |     |      |      |        |
|-----------------|-----|------|------|--------|-----|------|------|--------|
| ≤Middle school  | 6   | 324  | 1.00 |        | 3   | 327  | 1.00 |        |
| High school     | 60  | 1429 | 2.27 | 0.058  | 38  | 1451 | 2.85 | 0.08   |
| ≥College        | 171 | 2716 | 3.40 | 0.004  | 87  | 2800 | 3.39 | 0.04   |
| Having spouse   |     |      |      |        |     |      |      |        |
| No              | 54  | 810  | 1.00 |        | 33  | 831  | 1.00 |        |
| Yes             | 183 | 3659 | 0.75 | 0.072  | 95  | 3747 | 0.64 | 0.29   |
| Modes of access |     |      |      |        |     |      |      |        |
| Mobile only     | 69  | 2390 | 1.00 |        | 41  | 2418 | 1.00 |        |
| Desktop only    | 96  | 1778 | 1.87 | <0.001 | 47  | 1827 | 1.52 | 0.05   |
| Both            | 72  | 301  | 8.29 | <0.001 | 40  | 333  | 7.08 | <0.001 |
| Diabetes        |     |      |      |        |     |      |      |        |
| No              | 202 | 4023 | 1.00 |        | 105 | 4120 | 1.00 |        |
| Yes             | 35  | 446  | 1.56 | 0.019  | 23  | 458  | 1.97 | 0.00   |
| Hypertension    |     |      |      |        |     |      |      |        |

|                        |     |      |      |        |     |      |      |        |
|------------------------|-----|------|------|--------|-----|------|------|--------|
| No                     | 196 | 3817 | 1.00 |        | 107 | 3906 | 1.00 |        |
| Yes                    | 41  | 652  | 1.22 | 0.25   | 21  | 672  | 1.14 | 0.59   |
| Dyslipidemia           |     |      |      |        |     |      |      |        |
| No                     | 200 | 4052 | 1.00 |        | 105 | 4147 | 1.00 |        |
| Yes                    | 37  | 417  | 1.80 | 0.00   | 23  | 431  | 2.11 | 0.00   |
| Cancer                 |     |      |      |        |     |      |      |        |
| No                     | 149 | 3081 | 1.00 |        | 77  | 3153 | 1.00 |        |
| Yes                    | 88  | 1388 | 1.31 | 0.05   | 51  | 1425 | 1.47 | 0.04   |
| Obesity                |     |      |      |        |     |      |      |        |
| No                     | 228 | 4411 | 1.00 |        | 123 | 4516 | 1.00 |        |
| Yes                    | 9   | 58   | 3.00 | 0.00   | 5   | 62   | 2.96 | 0.02   |
| Chronic Kidney Disease |     |      |      |        |     |      |      |        |
| No                     | 219 | 4344 | 1.00 |        | 114 | 4449 | 1.00 |        |
| Yes                    | 18  | 125  | 2.86 | <0.001 | 14  | 129  | 4.24 | <0.001 |

|                            |     |      |       |        |     |      |      |        |
|----------------------------|-----|------|-------|--------|-----|------|------|--------|
| Acute Coronary Syndrome    |     |      |       |        |     |      |      |        |
| No                         | 217 | 4240 | 1.00  |        | 117 | 4340 | 1.00 |        |
| Yes                        | 20  | 229  | 1.71  | 0.03   | 11  | 238  | 1.71 | 0.09   |
| Number of chronic diseases |     |      |       |        |     |      |      |        |
| 0                          | 171 | 3668 | 1.00  |        | 83  | 3756 | 1.00 |        |
| 1                          | 42  | 585  | 1.54  | 0.015  | 29  | 598  | 2.19 | <0.001 |
| 2                          | 16  | 188  | 1.83  | 0.027  | 12  | 192  | 2.83 | 0.001  |
| 3                          | 7   | 27   | 5.56  | <0.001 | 4   | 30   | 6.03 | 0.001  |
| 4                          | 1   | 1    | 21.45 | 0.03   | 0   | 2    | 1.00 | NA     |
| □                          | □   | □    | □     | □      | □   | □    | □    | □      |

Abbreviation: NA, not available

Chronic diseases included in the number of chronic diseases: diabetes, dyslipidemia, obesity and chronic kidney disease, which showed a level of significance of less than 0.25

The active users of the Health Notes were defined as those who used it three times or more
